# Supplementary material for: Solvent effects for vertical absorption and emission processes in solution using a self-consistent state specific method based on constrained equilibrium thermodynamics
Source: Royal Society of Chemistry journal article supplement (doi:10.1039/c8cp00930a), 2018-01-01
Supplement: c8cp00930a1.pdf [file c8cp00930a1.pdf]

## Supporting Information

### Solvent effects for vertical absorption and emission processes in solution using a self-consistent state specific method based on constrained equilibrium thermodynamics

Ting-Jun Bi<sup>a</sup>, Long-Kun Xu<sup>a</sup>, Fan Wang<sup>\*b</sup> and Xiang-Yuan Li<sup>\*a</sup>

<sup>a</sup>College of Chemical Engineering, Sichuan University, Chengdu 610065, China. E-mail:  
xyli@scu.edu.cn

<sup>b</sup>Institute of Atomic and Molecular Physics, Sichuan University, Chengdu 610065, China. E-mail:  
wangf@scu.edu.cn

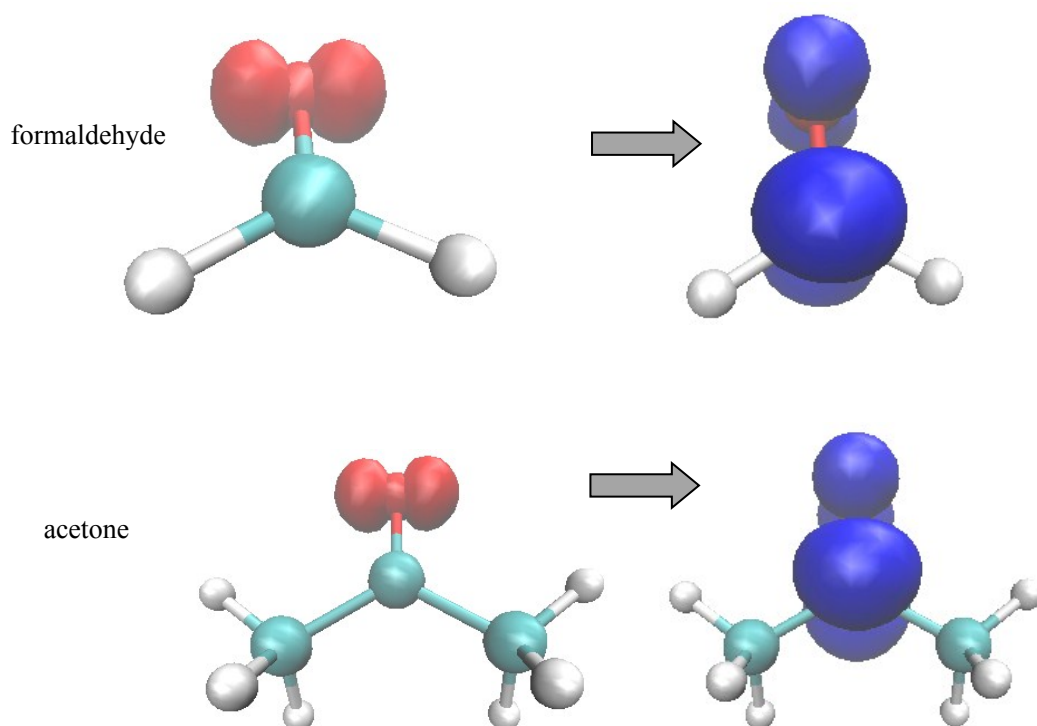

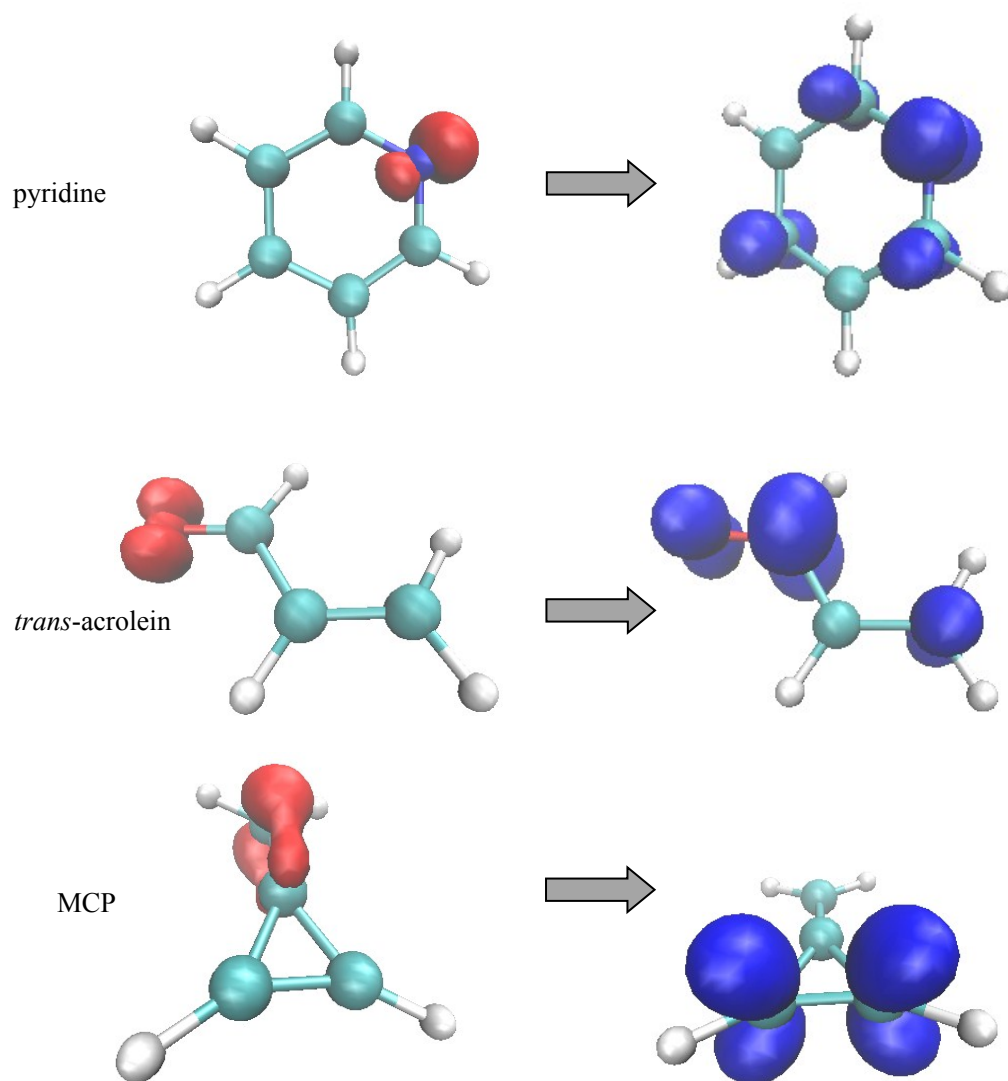

Figure S1: electron detachment (red) and attachment (blue) density plots for formaldehyde, acetone, pyridine, *trans*-acrolein and MCP calculated at ground state equilibrium geometry in water.
